# Supplementary material for: Repetitive transcranial magnetic stimulation over the orbitofrontal cortex for obsessive-compulsive disorder: a double-blind, crossover study
Source: PubMed Central journal article supplement (PMC4203001; doi:10.1038/tp.2014.62), 2014-09-09

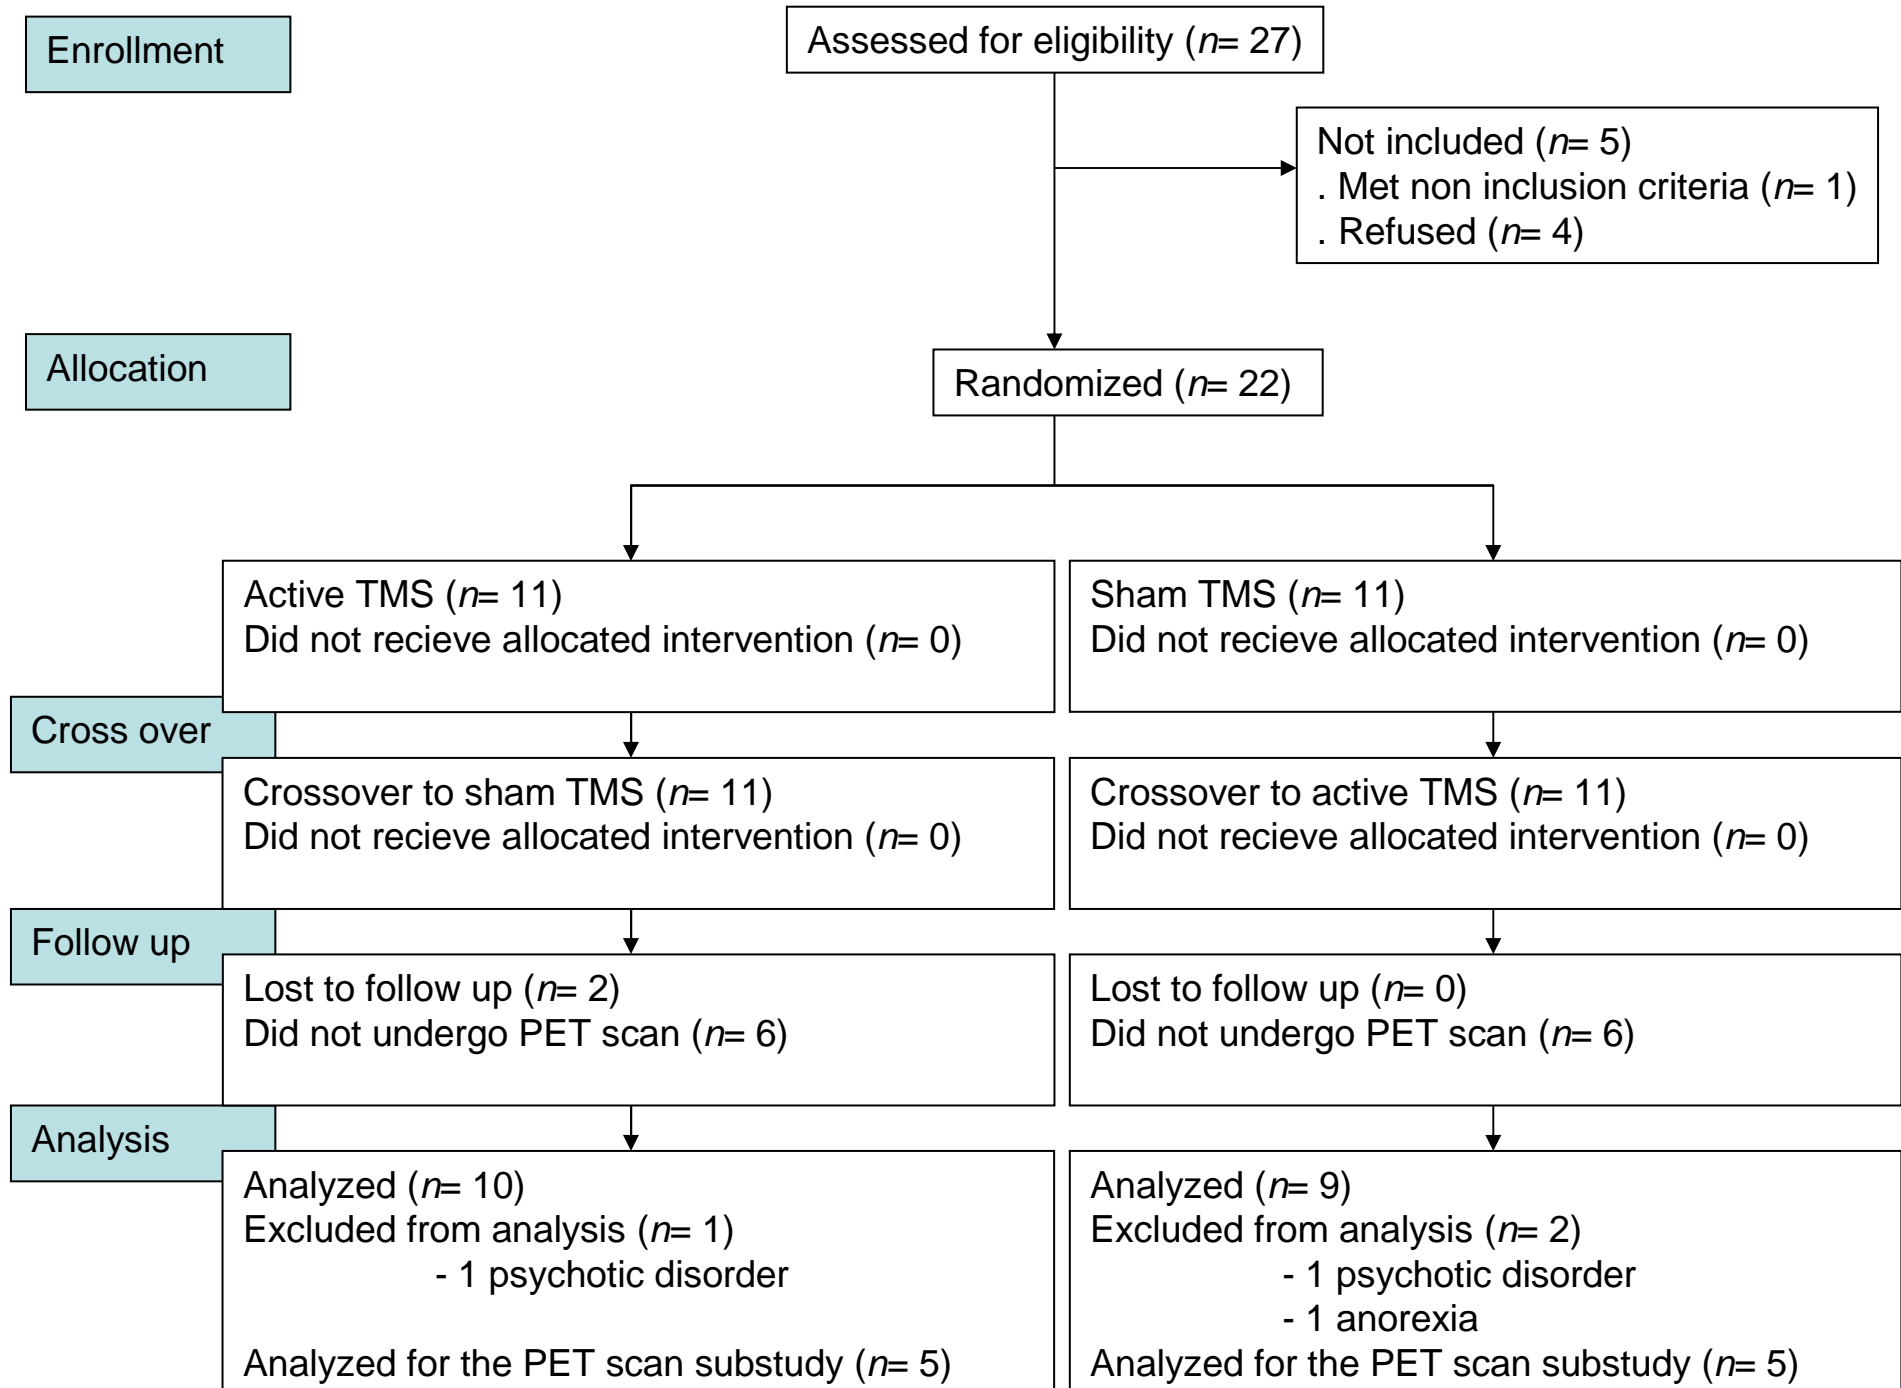

Supplement: tp201462x1.pdf [file tp201462x1.pdf]
